# Supplementary material for: EGFRvIII does not affect radiosensitivity with or without gefitinib treatment in glioblastoma cells
Source: PubMed Central journal article supplement (PMC4741808; doi:10.18632/oncotarget.5293), 2015-09-16
Supplement: oncotarget-06-33867-s001.pdf [file oncotarget-06-33867-s001.pdf]

## SUPPLEMENTARY FIGURES AND TABLES

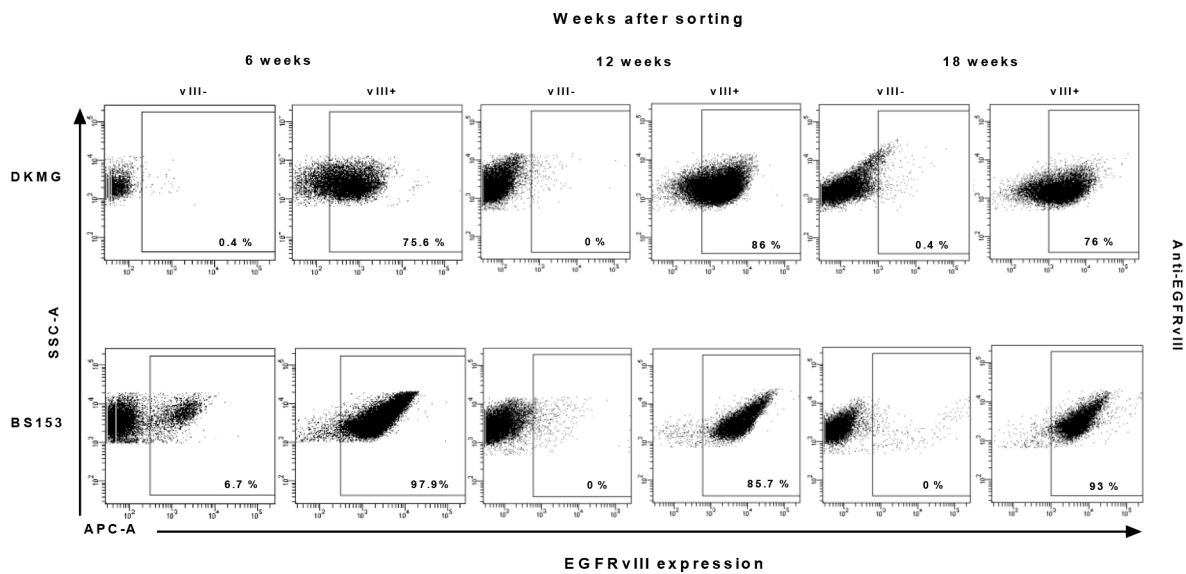

**Supplementary Figure S1: EGFRvIII expression in EGFRvIII+ and EGFRvIII- sublines at different time points.** EGFRvIII expression was quantified in DKMG and BS153 sub-lines by flow cytometry (dot plots). EGFRvIII was detected using an EGFRvIII-specific antibody (APC-A; SSC-A: side scatter). Cells were analyzed at different time points: 6 weeks (6 passages), 12 weeks (13 passages) and 18 weeks (20 passages) after sorting.

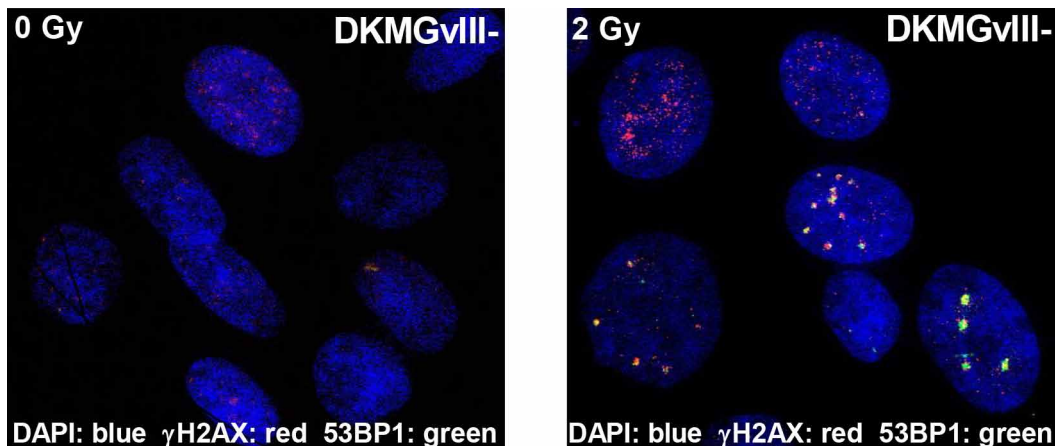

**Supplementary Figure S2: Impact of EGFRvIII expression on DSB repair capacity.** Residual DSB repair foci detected by  $\gamma$ H2AX (red) and 53BP1 (green) immunofluorescent staining in DKMGvIII<sup>-</sup> cells 24 h after irradiation with 2 Gy (DNA staining with DAPI: blue). Quantification of residual  $\gamma$ H2AX/53BP1 double positive foci in DKMGvIII<sup>-/+</sup> and BS153vIII<sup>-/+</sup> cells 24 h after irradiation with 2 Gy in Figure 4A.

A

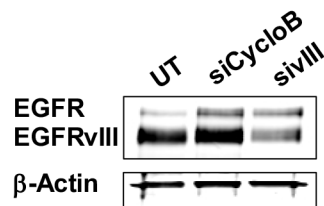

B

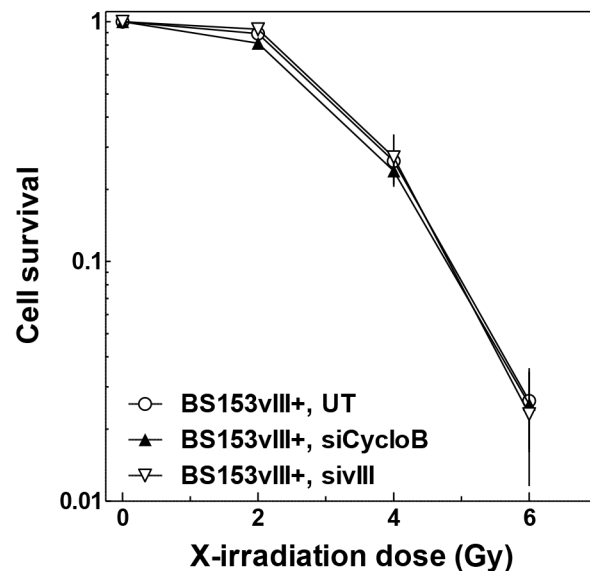

**Supplementary Figure S3: Cell survival after EGFRvIII knock down.** Cell survival after EGFRvIII specific knock down was determined by colony forming assay.  $1 \times 10^5$  cells were seeded per 6-well-plate and incubated for 30 min to enable attachment of cells. Cells were then transfected with 30 nM EGFRvIII specific siRNA or 30 nM Cyclophilin B siRNA as a control using Hyperfect (Quiagen) according to manufacturer instructions. Knock down was performed for 48 h hours. **A.** To determine the efficiency of the EGFRvIII specific knock down the cells were harvested, counted and prepared for Western Blot analysis. **B.** For colony formation assay 400 cells were seeded per 6-well plate 24 h prior irradiation. The medium was replaced 24 h after treatment, followed by further incubation with AmnioMax C-100 Basal Medium (Life Technologies) containing 10% FCS and C-100 supplement (Life Technologies) to optimize colony formation. Colonies were allowed to grow for 3 weeks. Colonies were then fixed in 70% ethanol and stained with crystal violet; colonies of more than 50 cells were counted. The surviving fraction of irradiated cells was normalized to the plating efficiency of un-irradiated cells. One representative experiment is shown.

**Supplementary Table S1: Genetic characterization of EGFRvIII<sup>-/+</sup> sublines**

| Parameter     | DKMG              |                   | BS153             |                   |
|---------------|-------------------|-------------------|-------------------|-------------------|
|               | vIII <sup>-</sup> | vIII <sup>+</sup> | vIII <sup>-</sup> | vIII <sup>+</sup> |
| PTEN          | C136Y             | C136Y             | T167A             | T167A             |
| p53           | WT                | WT                | R248Q             | R248Q             |
| DNA content*  | 1                 | 1                 | 1.9               | 1.9               |
| Chromosomes** | 43.6 (36–49)      | 43.6 (37–49)      | 81.3 (72–90)      | 80.7 (75–95)      |

\*x-fold compared to normal lymphocytes

\*\*average number of chromosomes (min/max)

**Supplementary Table S2: Authentication of EGFRvIII<sup>-/+</sup> sublines**

| Dye   | Locus    | Control theor.* | BS153vIII <sup>-</sup> | BS153vIII <sup>s+</sup> | DKMGvIII <sup>-</sup> | DKMGvIII <sup>+</sup> |
|-------|----------|-----------------|------------------------|-------------------------|-----------------------|-----------------------|
| 6-FAM | D8S1179  | 13              | 13                     | 13                      | 11 / 13               | 13                    |
|       | D21S11   | 30              | 28 / 29                | 28 / 29                 | 29 / 30 / 32.2        | 29 / 30               |
|       | D7S820   | 10 / 11         | 9 / 11                 | 9 / 11                  | 9 / 12                | 9 / 12                |
|       | CSF1PO   | 10 / 12         | 10 / 12                | 10 / 12                 | 10                    | 10                    |
|       | VIC      | D3S1358         | 14 / 15                | 17                      | 17                    | 15 / 16 / 17          |
| NED   | TH01 11  | 8 / 9.3         | 6 / 9                  | 6 / 9                   | 9.3                   | 9.3                   |
|       | D13S317  | 11              | 12                     | 12                      | 8 / 11                | 8 / 11                |
|       | D16S539  | 11 / 12         | 9                      | 9                       | 10 / 11 / 12          | 10 / 11               |
|       | D2S1338  | 19 / 23         | 17 / 25                | 17 / 25                 | 20 / 23 / 24 / 25     | 24 / 25               |
|       | D19S433  | 14 / 15         | 14 / 16.2              | 14 / 16.2               | 13 / 15.2             | 13 / 15.2             |
|       | vWA 12   | 17 / 18         | 15 / 18                | 15 / 18                 | 17 / 18 / 19          | 18 / 19               |
|       | TPOX 2   | 8               | 11                     | 11                      | 8                     | 8                     |
| PAT   | D18S51   | 15 / 19         | 12 / 17                | 12 / 17                 | 13 / 17               | 13 / 17               |
|       | Amel X,Y | X               | X                      | X                       | X                     | X                     |
|       | D5S818   | 11              | 11 / 13                | 11 / 13                 | 9 / 11                | 9 / 11                |
|       | FGA 4    | 23 / 24         | 21 / 22                | 21 / 22                 | 19 / 24               | 19 / 24               |

(AmpFISTR® Itentifiler® PCR Amplification Kit

\*GeneScan™ – 600 LIZ® Size Standard, Applied Biosystems)
